# Supplementary material for: Effect of Cd on cation redistribution and order-disorder transition in Cu2(Zn,Cd)SnS4
Source: Royal Society of Chemistry journal article supplement (doi:10.1039/c9ta09572a), 2019-01-01
Supplement: c9ta09572a1.pdf [file c9ta09572a1.pdf]

Supporting Information

# Effect of Cd on cation redistribution and order-disorder transition in $\text{Cu}_2(\text{Zn,Cd})\text{SnS}_4$

Shreyash Hadke, Wei Chen, Joel Ming Rui Tan, Maxim Guc, Victor Izquierdo-Roca, Gian-Marco Rignanese, Geoffroy Hautier, and Lydia Helena Wong

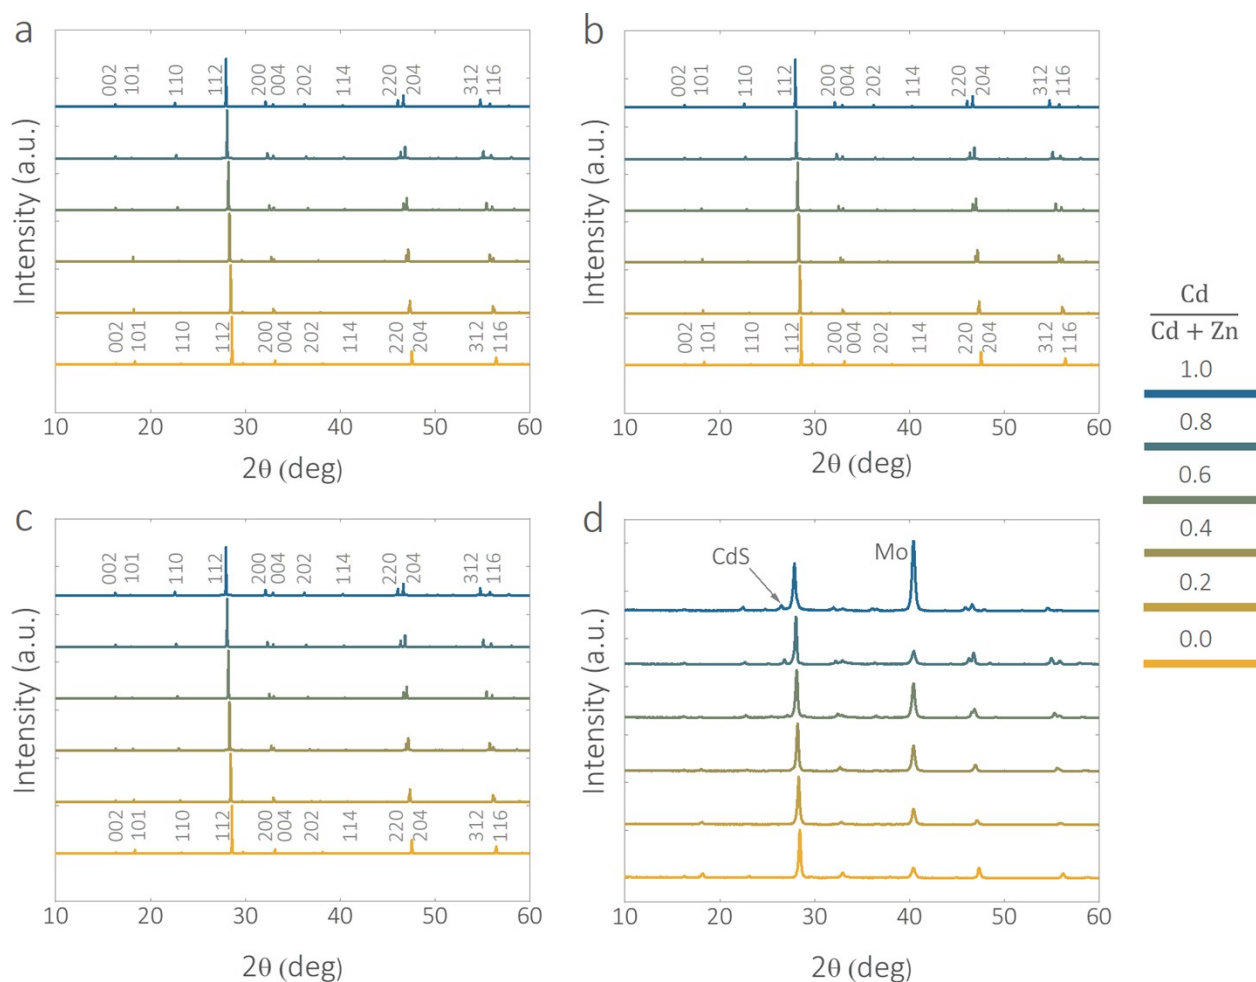

Figure S1: Simulated XRD patterns at different  $\text{Cu}/[\text{Cd}+\text{Zn}]$  ratios for transformation of kesterite  $\text{Cu}_2\text{ZnSnS}_4$  to stannite  $\text{Cu}_2\text{CdSnS}_4$  according to (a) model 1, (b) model 2, (c) model 3, and the corresponding (d) experimental XRD patterns.

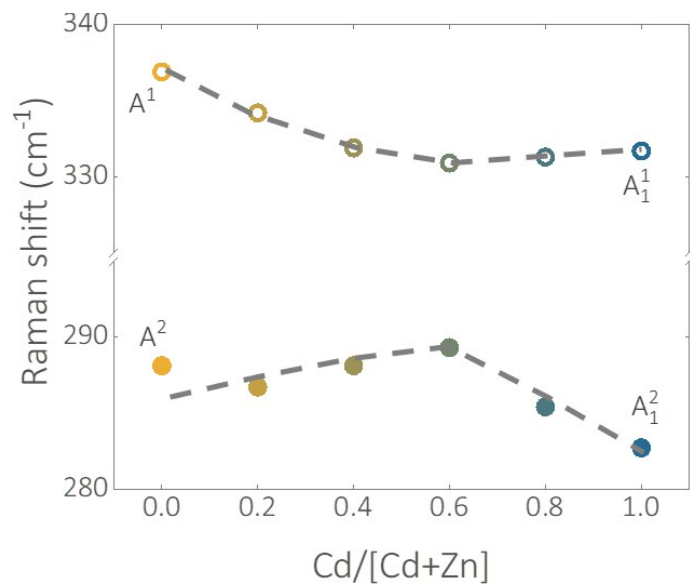

Figure S2: Position of the main A and A<sub>1</sub> mode peaks for Cu<sub>2</sub>Zn<sub>1-x</sub>Cd<sub>x</sub>SnS<sub>4</sub>.

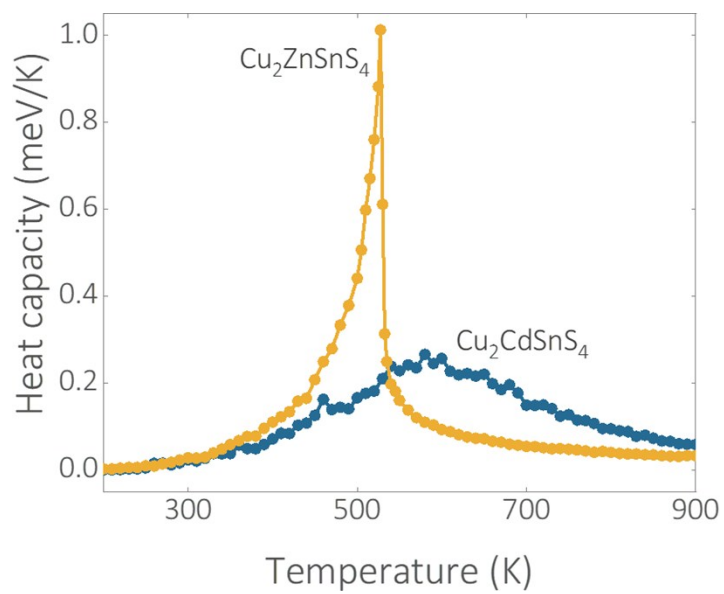

Figure S3: Calculated heat capacity for kesterite Cu<sub>2</sub>ZnSnS<sub>4</sub> and stannite Cu<sub>2</sub>CdSnS<sub>4</sub>.
